# Supplementary material for: Inhibition of nonsense-mediated mRNA decay (NMD) by a new chemical molecule reveals the dynamic of NMD factors in P-bodies
Source: PubMed Central journal article supplement — J Cell Biol. 2007 Sep 24;178(7):1145–60. doi: 10.1083/jcb.200611086 (PMC2064650; doi:10.1083/jcb.200611086), 2007-09-24
Supplement: jcellbiol_jcb.200611086_6.pdf [file jcellbiol_jcb.200611086_6.pdf]

## Supplemental materials

Feral et al., <http://www.jcb.org/cgi/content/full/jcb.200705090/DC1>

### Supplemental materials and methods

3 µg of total RNA was subject to RPA using RPA III ribonuclease protection assay (Ambion) according to the manufacturer's protocol. Probes were synthesized in vitro using T7 RNA polymerase (New England Biolabs, Inc.) in the presence of <sup>32</sup>P-radiolabeled GTP or UTP. PCR fragments that contain T7 promoter and antisense region of Gl, or GPx1 pre-mRNA or MUP mRNA, were used as templates. 5'-ACCACCGTAGAACGCAGATCG-3' and 5'-TAATACGACTCACTATAGGGTTGGTCTCCTTAAACCTGTC-3' primers were used to synthesize Gl probe. GPx1 probe was amplified with 5'-ACCACCGTAGAACGCAGATCG-3' and 5'-TAATACGACTCACTATAGGGGTACCAGAGGGAAAGTAAGCG-3' primers. Finally, MUP probe was obtained using 5'-CTGATGGGGCTCTATG-3' and 5'-TAATACGACTCACTATAGGGTCCTGGTGAGAAGTCTCC-3' primers.
